# Supplementary material for: Xanthine Oxidase Inhibitory Peptides from Larimichthys polyactis: Characterization and In Vitro/In Silico Evidence
Source: MDPI journal article supplement (doi:10.3390/foods12050982), 2023-02-25
Supplement: s1 [file s1]

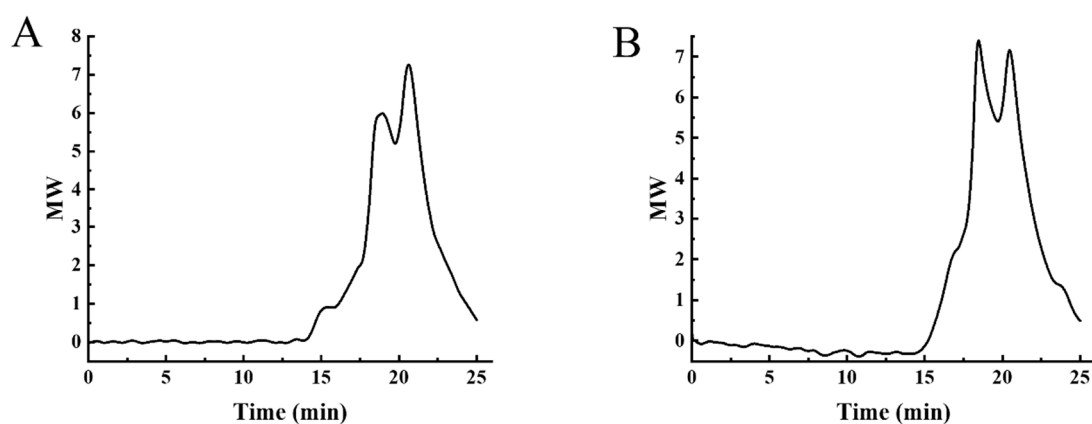

**Supplementary Figure S1.** MW distributions of small yellow croaker hydrolysates (A) and peptides molecular weight less than 3 kDa (B).

**Supplementary Table S1.** Relative peak table of small yellow croaker hydrolysates MW distributions.

| Distribution | Mn<br>(Daltons) | Mw<br>(Daltons) | MP<br>(Daltons) | Mz<br>(Daltons) | Mz+1<br>(Daltons) | Slice Area |
|--------------|-----------------|-----------------|-----------------|-----------------|-------------------|------------|
| 1            | 14,787          | 17,973          | 13,587          | 22,127          | 26,694            | 583        |
| 2            | 2744            | 3381            | 1558            | 4219            | 5073              | 1335       |
| 3            | 591             | 686             | 583             | 804             | 929               | 5947       |

**Supplementary Table S2.** Relative peak table of peptides molecular weight less than 3 kDa MW distributions.

| Distribution | Mn<br>(Daltons) | Mw<br>(Daltons) | MP<br>(Daltons) | Mz<br>(Daltons) | Mz+1<br>(Daltons) | Slice Area |
|--------------|-----------------|-----------------|-----------------|-----------------|-------------------|------------|
| 1            | 3884            | 511             | 2197            | 7461            | 11,014            | 1694       |
| 2            | 672             | 827             | 800             | 1039            | 1277              | 7577       |
